# Supplementary material for: Creation of a Pilot School Health Research Network in an English Education Infrastructure to Improve Adolescent Health and Well-Being: A Study Protocol
Source: MDPI journal article supplement (doi:10.3390/ijerph192013711), 2022-10-21
Supplement: s1 [file s1]

# South West School Health Research Network Logic Model

## TARGET

(Who is intervention for?)

### Individuals

- ▶ Students in Year 8
- ▶ Students in Year 10
- ▶ Secondary school staff

### Stakeholder Groups

- ▶ Directors of Public Health
- ▶ Directors of Children's Services
- ▶ Directors of Education
- ▶ School senior leadership teams

### Systems

- ▶ Individual schools
- ▶ Academy/multi-academy trusts
- ▶ Local authorities

## SW-SHRN INTERVENTION

(What is the intervention?)

### Data Collection

- ▶ Student survey every 2 years
- ▶ School environment survey
- ▶ Stakeholder interviews
- ▶ Health economic data
- ▶ Linking with routine health and education datasets

### Reporting Results to Participants

- ▶ Benchmarked reports for schools
- ▶ Benchmarked reports for local authorities
- ▶ Feedback meeting with schools

### Working with Participants

- ▶ Health promotion worker
- ▶ Network-wide events and resources

### Wider Dissemination and Engagement

- ▶ Network website and newsletters
- ▶ Public events and webinars

## CHANGE MECHANISMS

(How & why does the intervention work?)

### Identification

- ▶ Target health and wellbeing domains requiring intervention
- ▶ Current health policies and practice in schools

### Knowledge Mobilisation

- ▶ Share evidence base with schools and local authorities
- ▶ Knowledge sharing across schools and facilitation of partnership working

### Tracking Over Time

- ▶ Monitor change and impact of interventions or policies
- ▶ Explore health trajectories over time
- ▶ Relationships between health and wellbeing domains and behaviours
- ▶ Relationships between school culture, environment, and practice, and health and wellbeing outcomes

## OUTCOMES

(What difference will it make?)

### Student Outcomes

- ▶ Improved health & wellbeing (*assessed via student survey*)
- ▶ Reduction in health risk behaviours (*assessed via student survey*)
- ▶ Improved educational attainment (*assessed via future data linkage*)

### School Outcomes

- ▶ Improvements in key student outcomes (*assessed via future data linkage*)
- ▶ Improved understanding of student health and wellbeing (*assessed via student & school environment survey*)
- ▶ Improved knowledge of evidenced-based health interventions policies and more effective policy making (*assessed via school environment survey*)
- ▶ Improved partnership working (*assessed via qualitative interviews & network events*)
- ▶ Improved cost effectiveness of health spending (*assessed via health economic evaluation*)

### Wider Outcomes

- ▶ More efficient use of health funding (*assessed via health economic evaluation*)

## MODERATORS (What factors will influence the change process?)

### School Level

- ▶ School IT access for online survey
- ▶ School culture
- ▶ School status (e.g. academy)
- ▶ School demographics
- ▶ School/Senior leadership buy-in
- ▶ Relationship between partners involved
- ▶ Knowledge exchange between members

### Network Level

- ▶ Number of schools involved
- ▶ Diversity of schools involved

### Wider Context

- ▶ Local authority buy-in
- ▶ Existing health and wellbeing surveys
- ▶ Curriculum pressures

## 15 local authorities in the South West of England

| Local Authority Name                |
|-------------------------------------|
| Bath and North East Somerset        |
| Bournemouth, Christchurch and Poole |
| Bristol                             |
| Cornwall                            |
| Devon                               |
| Dorset                              |
| Gloucestershire                     |
| Isles of Scilly                     |
| North Somerset                      |
| Plymouth                            |
| Somerset                            |
| South Gloucestershire               |
| Swindon                             |
| Torbay                              |
| Wiltshire                           |
